# Supplementary material for: Effects of elevated CO 2 and extreme climatic events on forage quality and in vitro rumen fermentation in permanent grassland
Source: Copernicus journal article supplement (doi:10.5194/bg-18-4841-2021), 2021-08-30

## Supplementary materials

**Table S1.** Above-ground mass and fractions of green material, flower and dead material, and relative abundance of functional groups, the ten most abundant species and other species (< 15%) in plant community subjected to two levels of CO<sub>2</sub> concentration (390 and 520 ppm) with or without extreme climatic event (ECE) at three different **cutting dates**

| CO <sub>2</sub> (ppm)                              | Cut April |          | Cut June |          | Cut November         |                       | ECE                   |                     |
|----------------------------------------------------|-----------|----------|----------|----------|----------------------|-----------------------|-----------------------|---------------------|
|                                                    |           |          |          |          | Control              |                       |                       |                     |
|                                                    | 390       | 520      | 390      | 520      | 390                  | 520                   | 390                   | 520                 |
| Above-ground mass (g/m <sup>2</sup> )              | 109 ± 24  | 124 ± 25 | 195 ± 41 | 175 ± 21 | 116 ± 33             | 148 ± 63              | 152 ± 39              | 169 ± 76            |
| <i>Fractions (%)</i>                               |           |          |          |          |                      |                       |                       |                     |
| Green material                                     | 83 ± 6    | 80 ± 5   | 59 ± 14  | 68 ± 15  | 50 ± 10 <sup>b</sup> | 65 ± 14 <sup>ab</sup> | 76 ± 12 <sup>ab</sup> | 78 ± 3 <sup>a</sup> |
| Flower                                             | 9 ± 5     | 14 ± 4   | 39 ± 14  | 31 ± 14  | 3 ± 3                | 1 ± 1                 | 0 ± 0                 | 0 ± 0               |
| Dead material                                      | 8 ± 6     | 6 ± 3    | 1 ± 1    | 1 ± 0    | 46 ± 7               | 34 ± 15               | 24 ± 12               | 22 ± 3              |
| <i>Relative abundance of functional groups (%)</i> |           |          |          |          |                      |                       |                       |                     |
| Grasses                                            | 89 ± 7    | 89 ± 11  | 87 ± 5   | 86 ± 11  | 81 ± 22              | 88 ± 14               | 97 ± 4                | 77 ± 17             |
| Legumes                                            | 1 ± 1     | 1 ± 1    | 3 ± 6    | 3 ± 5    | 12 ± 20              | 1 ± 1                 | 0 ± 0                 | 1 ± 1               |
| Forbs                                              | 10 ± 7    | 11 ± 10  | 10 ± 5   | 11 ± 8   | 7 ± 2                | 12 ± 14               | 3 ± 4                 | 22 ± 17             |
| <i>Relative abundance of species (%)</i>           |           |          |          |          |                      |                       |                       |                     |
| <i>Agrostis spp</i>                                | 14 ± 8    | 9 ± 6    | 11 ± 5   | 12 ± 11  | 13 ± 6 <sup>ab</sup> | 22 ± 7 <sup>a</sup>   | 13 ± 9 <sup>ab</sup>  | 3 ± 1 <sup>b</sup>  |
| <i>Arrhenaterum elatius</i>                        | 2 ± 4     | 8 ± 12   | 6 ± 9    | 11 ± 18  | 1 ± 1                | 0 ± 0                 | 0 ± 0                 | 11 ± 20             |
| <i>Alopecurus pratensis</i>                        | 11 ± 9    | 7 ± 4    | 11 ± 10  | 6 ± 3    | 7 ± 5                | 6 ± 2                 | 34 ± 29               | 5 ± 2               |
| <i>Dactylis glomerata</i>                          | 11 ± 12   | 11 ± 10  | 16 ± 17  | 9 ± 9    | 17 ± 24              | 7 ± 6                 | 20 ± 27               | 32 ± 25             |
| <i>Holcus lanatus</i>                              | 32 ± 15   | 28 ± 12  | 30 ± 12  | 30 ± 14  | 24 ± 10 <sup>a</sup> | 24 ± 18 <sup>a</sup>  | 0 ± 0 <sup>b</sup>    | 3 ± 2 <sup>ab</sup> |
| <i>Lolium perenne</i>                              | 7 ± 6     | 9 ± 6    | 5 ± 4    | 5 ± 5    | 3 ± 5                | 3 ± 2                 | 1 ± 2                 | 2 ± 3               |
| <i>Poa angustifolia</i>                            | 3 ± 4     | 3 ± 2    | 4 ± 7    | 3 ± 2    | 6 ± 5                | 16 ± 9                | 13 ± 21               | 10 ± 8              |
| <i>Poa pratensis</i>                               | 3 ± 3     | 4 ± 4    | 1 ± 1    | 1 ± 1    | 9 ± 5                | 2 ± 1                 | 13 ± 18               | 9 ± 13              |
| <i>Trisetum flavescens</i>                         | 3 ± 2     | 3 ± 2    | 3 ± 2    | 5 ± 6    | 0 ± 1                | 1 ± 0                 | 2 ± 2                 | 1 ± 1               |
| <i>Ranunculus acris</i>                            | 3 ± 3     | 2 ± 1    | 5 ± 2    | 2 ± 1    | 5 ± 2                | 2 ± 1                 | 1 ± 1                 | 1 ± 0               |
| Other species                                      | 10 ± 6    | 16 ± 9   | 8 ± 6    | 14 ± 11  | 15 ± 25              | 17 ± 14               | 3 ± 3                 | 22 ± 18             |

Data shown are mean ± standard deviation. <sup>a,b</sup> For the cut of November and annual data, means in a same row with different letters are **significantly different** (p < 0.05). n=6 for April and June cuts; n=3 for November cut

**Table S2.** Effects of **cutting date** and its interaction with CO<sub>2</sub> (*p*-values) on above-ground mass yield, fractions of green material, flower and dead material, and relative abundance of functional groups, the ten most abundant species and other species (< 15%) in plant community subjected to two levels of CO<sub>2</sub> concentration (390 and 520 ppm) with or without extreme climatic event (ECE) at three different cuts

|                             | Cutting date effect | Cutting date × CO <sub>2</sub> effect |
|-----------------------------|---------------------|---------------------------------------|
| Above-ground mass           | <b>0.025</b>        | 0.258                                 |
| <i>Fractions</i>            |                     |                                       |
| Green material              | < <b>0.001</b>      | 0.376                                 |
| Flower                      | < <b>0.001</b>      | 0.188                                 |
| Dead material               | < <b>0.001</b>      | 0.409                                 |
| d.f (num/den)               | 3/24                | 4/15                                  |
|                             |                     |                                       |
| Grasses                     | 0.807               | 0.390                                 |
| Legumes                     | 0.370               | 0.856                                 |
| Forbs                       | 0.971               | <u>0.097</u>                          |
| d.f (num/den)               | 2/18                | 3/12                                  |
|                             |                     |                                       |
| <i>Agrostis spp</i>         | 0.854               | 0.577                                 |
| <i>Arrhenaterum elatius</i> | <u>0.061</u>        | 0.840                                 |
| <i>Alopecurus pratensis</i> | 0.113               | <u>0.060</u>                          |
| <i>Dactylis glomerata</i>   | <u>0.087</u>        | 0.686                                 |
| <i>Holcus lanatus</i>       | < <b>0.001</b>      | 0.684                                 |
| <i>Lolium perenne</i>       | < <b>0.001</b>      | 0.677                                 |
| <i>Poa angustifolia</i>     | <b>0.002</b>        | 0.495                                 |
| <i>Poa pratensis</i>        | <b>0.003</b>        | 0.227                                 |
| <i>Trisetum flavescens</i>  | <b>0.003</b>        | 0.606                                 |
| <i>Ranunculus acris</i>     | 0.140               | <u>0.067</u>                          |
| Other species               | 0.725               | 0.308                                 |
| d.f (num/den)               | 2/18                | 3/14                                  |

d.f (num/den), degrees of freedom (numerator and denominator). In bold:  $p < 0.05$ ; Underlined:  $0.05 < p < 0.1$

**Table S3.** Effects of **cutting date** and its interaction with CO<sub>2</sub> (*p*-values) on chemical composition and *in vitro* rumen fermentation parameters of plant community subjected to two levels of CO<sub>2</sub> concentration (390 and 520 ppm) with or without extreme climatic event (ECE) at three different **cutting dates**

|                                               | <b>Cutting date</b> effect | <b>Cutting date</b> × CO <sub>2</sub> effect |
|-----------------------------------------------|----------------------------|----------------------------------------------|
| <i>Chemical composition</i>                   |                            |                                              |
| OM                                            | <b>0.009</b>               | 0.254                                        |
| C                                             | 0.166                      | 0.413                                        |
| N                                             | < <b>0.001</b>             | < <b>0.001</b>                               |
| C:N ratio                                     | < <b>0.001</b>             | < <b>0.001</b>                               |
| NDF                                           | < <b>0.001</b>             | 0.130                                        |
| NDF:N ratio                                   | < <b>0.001</b>             | < <b>0.001</b>                               |
| WSC                                           | < <b>0.001</b>             | 0.186                                        |
| Glucose                                       | < <b>0.001</b>             | 0.108                                        |
| Sucrose                                       | < <b>0.001</b>             | 0.811                                        |
| Fructose                                      | < <b>0.001</b>             | 0.206                                        |
| Fructans                                      | <b>0.002</b>               | 0.119                                        |
| Condensed tanins                              | <b>0.012</b>               | 0.753                                        |
| Pepsin-cellulase OM digestibility             | < <b>0.001</b>             | 0.304                                        |
| d.f (num/den)                                 | 2/24                       | 3/24                                         |
| <i>In vitro rumen fermentation parameters</i> |                            |                                              |
| Acidification (dpH)                           | < <b>0.001</b>             | <u>0.059</u>                                 |
| IVDMD                                         | < <b>0.001</b>             | 0.104                                        |
| NH <sub>3</sub>                               | < <b>0.001</b>             | < <b>0.001</b>                               |
| Total VFA                                     | < <b>0.001</b>             | 0.294                                        |
| Acetate                                       | <b>0.022</b>               | 0.557                                        |
| Propionate                                    | <b>0.003</b>               | <u>0.057</u>                                 |
| Butyrate                                      | <b>0.011</b>               | 0.951                                        |
| Valerate                                      | <b>0.003</b>               | <b>0.016</b>                                 |
| Iso-butyrate                                  | 0.273                      | <u>0.095</u>                                 |
| Iso-valerate                                  | <b>0.010</b>               | <b>0.031</b>                                 |
| Acetate:propionate ratio                      | <b>0.003</b>               | 0.148                                        |

|                                        |                |       |
|----------------------------------------|----------------|-------|
| Total gas                              | < <b>0.001</b> | 0.759 |
| CH <sub>4</sub>                        | < <b>0.001</b> | 0.702 |
| CO <sub>2</sub>                        | < <b>0.001</b> | 0.686 |
| CO <sub>2</sub> :CH <sub>4</sub> ratio | <u>0.094</u>   | 0.856 |
| d.f (num/den)                          | 2/24           | 3/24  |

OM, organic matter; C, carbon; N, nitrogen; NDF, neutral detergent fiber; WSC: water-soluble carbohydrates; CT, condensed tannins; IVDMD, *in vitro* dry matter degradability, VFA, volatile fatty acids; d.f (num/den), degrees of freedom (numerator and denominator). In bold:  $p < 0.05$ ; Underlined:  $0.05 < p < 0.1$

**Table S4.** Spearman correlation coefficients of i) above-ground biomass characteristics against chemical composition (first excel sheet), ii) *in vitro* rumen fermentation parameters against chemical composition (second excel sheet) and iii) *in vitro* rumen fermentation parameters against above-ground biomass characteristics (third excel sheet) (n = 36 with  $p$ -value < 0.001 in red,  $p$ -value < 0.01 in orange and  $p$ -value < 0.05 in yellow).

See supplementary Excel file

**Figure S1.** Relationships between the abundance of selected plant species (*Lolium perenne*, *Holcus lanatus* and *Alopecurus pratensis*), chemical parameters (fructan content in g.kg<sup>-1</sup> DM, NDF:N ratio and N content in g.kg<sup>-1</sup> DM), and *in vitro* rumen fermentation parameters (IVDMD in g.kg<sup>-1</sup>, iso-valerate in % and NH<sub>3</sub> in mmol.L<sup>-1</sup>). The lines indicate linear relationships for significant Spearman correlation (Table S4; p<0.05; n = 36)

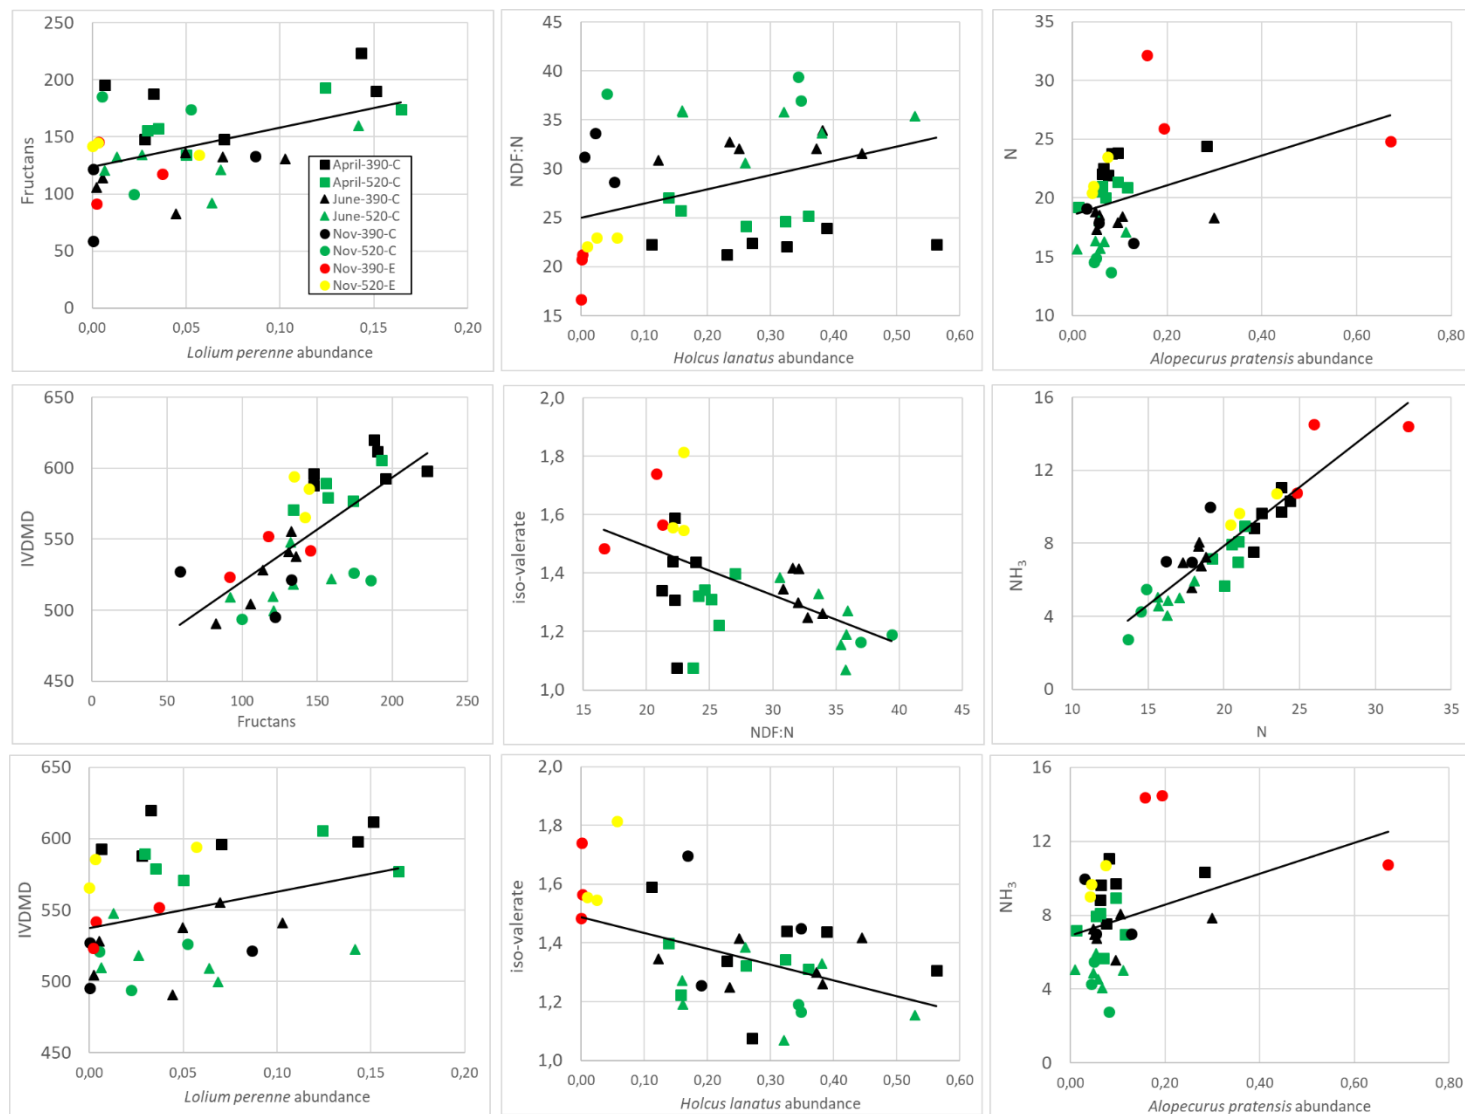

Supplement: Supplementary file 1 [file bg-18-4841-2021-supplement.zip › Supplementary materials_R2.pdf]
