# Supplementary material for: Effects of elevated CO 2 and extreme climatic events on forage quality and in vitro rumen fermentation in permanent grassland
Source: Copernicus journal article supplement (doi:10.5194/bg-18-4841-2021), 2021-08-30
Supplement: Supplementary file 1 [file bg-18-4841-2021-supplement.zip]

Archive with 3 entries (3 files):
- bg-18-4841-2021-supplement-title-page.pdf
- Table S4_R2.xlsx
- Supplementary materials_R2.pdf
