# Supplementary material for: Effects of elevated CO 2 and extreme climatic events on forage quality and in vitro rumen fermentation in permanent grassland
Source: Copernicus journal article supplement (doi:10.5194/bg-18-4841-2021), 2021-08-30
Supplement: Supplementary file 1 [file bg-18-4841-2021-supplement.zip › bg-18-4841-2021-supplement-title-page.pdf]

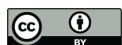

*Supplement of*

**Effects of elevated CO<sub>2</sub> and extreme climatic events on forage quality and in vitro rumen fermentation in permanent grassland**

**Vincent Niderkorn et al.**

*Correspondence to:* Vincent Niderkorn ([vincent.niderkorn@inrae.fr](mailto:vincent.niderkorn@inrae.fr))

- [bg-18-4841-2021-supplement-title-page.pdf](#)
- [Supplementary materials\\_R2.pdf](#)
- [Table S4\\_R2.xlsx](#)

The copyright of individual parts of the supplement might differ from the article licence.
