# Supplementary material for: Effects of elevated CO 2 and extreme climatic events on forage quality and in vitro rumen fermentation in permanent grassland
Source: Copernicus journal article supplement (doi:10.5194/bg-18-4841-2021), 2021-08-30
Supplement: Supplementary file 1 [file Table S4_R2.xlsx]

## Sheet: Chemistry - Plants
i) above-ground biomass characteristics against chemical composition
		Chemical composition
	Spearman correlations:	OM	C	N	C:N ratio	NDF	NDF:N ratio	WSC	Glucose	Fructose	Sucrose	Fructans	CT	Pepsin-cellulase OM digestibility
	Above ground biomass	0.163	0.0863	-0.3518	0.3543	0.463	0.323	-0.342	-0.0336	-0.0485	-0.2896	-0.4213	0.3653	-0.3986			p-value <0.05
Fractions	Green material	0.0916	0.1532	0.5235	-0.5255	-0.5521	-0.5322	0.6025	0.2328	0.349	0.558	0.588	-0.1891	0.8328			p-value <0.01
	Flower	0.3992	0.2143	-0.3447	0.3879	0.5422	0.4154	0.0508	0.5784	0.4194	0.3066	-0.1776	0.1461	-0.2463			p-value <0.001
	Dead material	-0.3476	-0.2272	0.2064	-0.2403	-0.4417	-0.2532	-0.1275	-0.614	-0.5227	-0.3717	0.107	-0.212	0.0258
Relative abundance of functional groups	Grasses	0.1381	0.3095	0.1661	-0.1647	0.0734	-0.1048	0.0098	-0.1667	-0.0975	-0.1695	0.0403	-0.1611	0.2011
	Legumes	0.0897	0.0748	-0.1725	0.1859	0.0455	0.1321	0.2641	0.4496	0.4372	0.2987	0.1692	0.4343	-0.0928
	Forbs	-0.0857	-0.3961	-0.1541	0.1518	-0.1768	0.0762	0.0874	0.0759	0.0406	0.2328	0.0779	-0.0356	-0.0793
Relative abundance of species	Agrostis spp	-0.0204	0.0549	-0.1476	0.1613	0.1445	0.1992	-0.0034	-0.2266	-0.2034	-0.2087	0.0266	-0.3255	-0.1692
	Arrhenaterum elatius	0.1657	0.0509	-0.1474	0.1468	0.0601	0.1834	0.0832	0.1132	0.0468	0.086	0.062	-0.2492	0.1404
	Alopecurus pratensis	-0.1289	0.4067	0.4123	-0.3913	-0.0504	-0.4006	0.1661	0.1275	0.135	0.0445	0.1692	0.005	0.2244
	Dactylis glomerata	-0.2254	0.0868	0.1531	-0.1609	-0.1756	-0.2027	-0.1962	-0.1032	-0.035	-0.1472	-0.1401	0.1143	0.0513
	Holcus lanatus	0.2468	0.2389	-0.3291	0.3426	0.3297	0.3821	0.1661	0.3756	0.3625	0.2025	0.0487	0.1555	-0.0409
	Lolium perenne	0.1821	-0.0485	-0.0317	0.0546	0.002	0.0983	0.4639	0.3345	0.295	0.4966	0.381	-0.402	0.1588
	Poa angustifolia	-0.1633	-0.4206	-0.1649	0.142	-0.136	0.1412	0.0903	-0.3395	-0.3184	-0.1034	0.1814	-0.2063	0.059
	Poa pratensis	0.0454	-0.0283	0.3112	-0.3322	-0.2546	-0.3165	0.0944	-0.1423	-0.1902	0.0535	0.1359	-0.0636	0.2807
	Trisetum flavescens	0.2105	0.0353	0.1759	-0.1531	0.0328	-0.1826	0.2989	0.4293	0.3726	0.4838	0.153	0.1618	0.1188
	Ranunculus acris	-0.1129	0.0032	-0.25	0.2448	0.4304	0.2733	-0.0773	0.2052	0.1108	-0.0713	-0.1863	0.2158	-0.2496
	Other species	0.107	-0.3283	-0.1039	0.1081	-0.3031	0.0434	0.209	0.1112	0.0846	0.2543	0.191	0.0616	-0.0087
		Chemical composition
	Pairwise two-sided p-values:	OM	C	N	C:N ratio	NDF	NDF:N ratio	WSC	Glucose	Fructose	Sucrose	Fructans	CT	Pepsin-cellulase OM digestibility
	Above ground biomass	0.3494	0.6222	0.0382	0.0368	0.0051	0.0584	0.0443	0.848	0.7822	0.0915	0.0117	0.031	0.0177			p-value <0.05
Fractions	Green material	0.6008	0.3795	0.0012	0.0012	0.0006	0.001	0.0001	0.1784	0.0399	0.0005	0.0002	0.2767	<0.0001			p-value <0.01
	Flower	0.0175	0.2164	0.0426	0.0213	0.0008	0.0131	0.7721	0.0003	0.0122	0.0732	0.3075	0.4022	0.1538			p-value <0.001
	Dead material	0.0407	0.1894	0.2341	0.1643	0.0079	0.1422	0.4656	<.0001	0.0013	0.0279	0.5407	0.2214	0.8832
Relative abundance of functional groups	Grasses	0.4289	0.0704	0.3403	0.3444	0.6752	0.5492	0.9554	0.3386	0.5775	0.3304	0.818	0.3553	0.2467
	Legumes	0.6084	0.6693	0.3219	0.2849	0.7953	0.4495	0.1252	0.0067	0.0086	0.0813	0.3312	0.0091	0.5959
	Forbs	0.6244	0.0185	0.3769	0.384	0.3098	0.6636	0.6176	0.6647	0.8168	0.1784	0.6566	0.8392	0.6508
Relative abundance of species	Agrostis spp	0.9072	0.7541	0.3974	0.3545	0.4074	0.2514	0.9847	0.1905	0.2413	0.229	0.8794	0.0564	0.3312
	Arrhenaterum elatius	0.3413	0.7714	0.3981	0.4002	0.7317	0.2915	0.6347	0.5172	0.7894	0.6231	0.7235	0.1488	0.421
	Alopecurus pratensis	0.4607	0.0153	0.0138	0.0201	0.7736	0.0171	0.3403	0.4656	0.4393	0.7995	0.3312	0.9771	0.1951
	Dactylis glomerata	0.193	0.6199	0.3799	0.3557	0.3129	0.2429	0.2586	0.5551	0.8417	0.3987	0.4223	0.5133	0.7699
	Holcus lanatus	0.153	0.1669	0.0535	0.044	0.0531	0.0235	0.3403	0.0262	0.0324	0.2433	0.781	0.3725	0.8156
	Lolium perenne	0.2952	0.7822	0.8568	0.7553	0.9911	0.5742	0.005	0.0496	0.0854	0.0024	0.024	0.0167	0.3621
	Poa angustifolia	0.3485	0.0119	0.344	0.4157	0.436	0.4185	0.6058	0.046	0.0623	0.5546	0.297	0.2344	0.7365
	Poa pratensis	0.7958	0.8718	0.0688	0.0512	0.1399	0.0639	0.5896	0.4148	0.2738	0.7602	0.4365	0.7167	0.1024
	Trisetum flavescens	0.2248	0.8405	0.3121	0.3799	0.8517	0.2936	0.0811	0.0101	0.0275	0.0032	0.3804	0.3532	0.4968
	Ranunculus acris	0.5185	0.9853	0.1475	0.1563	0.0099	0.1122	0.6589	0.237	0.5263	0.684	0.284	0.213	0.1482
	Other species	0.5407	0.0542	0.5525	0.5364	0.0768	0.8044	0.2283	0.5248	0.629	0.1404	0.2716	0.7251	0.9605
	Number of observations: 36

## Sheet: Fermentation - Chemistry
ii) in vitro rumen fermentation parameters against chemical composition
		In vitro rumen fermentation parameters
	Spearman correlations:	Acidification	IVDM	NH3	Total VFA	Acetate	Propionate	Butyrate	Valerate	Iso-butyrate	Iso-valerate	Acetate: propionate ratio	Total gas	CH4	CO2	CO2:CH4 ratio
Chemical composition	OM	0.5485	0.0608	-0.2742	0.1812	0.0347	0.0176	0.0305	-0.2193	-0.3176	-0.4423	0.0134	0.4084	0.4174	0.3936	0.0221			p-value <0.05
	C	0.2569	0.0989	0.1566	0.2109	-0.2048	0.1835	0.0773	0.193	0.1218	0.1286	-0.1922	0.186	0.1924	0.1605	-0.0527			p-value <0.01
	N	0.0902	0.6978	0.9106	0.5014	-0.428	0.5266	-0.109	0.6826	0.495	0.6378	-0.5039	0.4151	0.4465	0.4053	-0.2796			p-value <0.001
	C:N ratio	-0.0542	-0.6933	-0.9216	-0.4728	0.4095	-0.5092	0.1305	-0.6846	-0.4835	-0.6448	0.4854	-0.3969	-0.4342	-0.3877	0.2969
	NDF	-0.1951	-0.6969	-0.4406	-0.4342	0.2087	-0.3218	0.0905	-0.4025	-0.0583	-0.242	0.2947	-0.4734	-0.4866	-0.4669	0.1717
	NDF:N ratio	-0.0279	-0.6829	-0.9045	-0.4462	0.4165	-0.4972	0.1193	-0.7126	-0.4672	-0.6557	0.4773	-0.3815	-0.4034	-0.3734	0.2471
	WSC	0.7537	0.6908	0.1204	0.6118	-0.1224	0.3022	0.1216	-0.1078	-0.1779	-0.2098	-0.2583	0.8221	0.7546	0.8031	-0.1062
	Glucose	0.5926	0.3036	0.105	0.395	-0.3824	0.3339	0.4611	-0.0014	0.1022	0.0333	-0.381	0.5078	0.3773	0.5168	0.1703
	Fructose	0.59	0.3835	0.1367	0.428	-0.4196	0.4221	0.4451	0.0286	0.1238	0.0689	-0.4501	0.5532	0.3941	0.5597	0.1807
	Sucrose	0.7746	0.6885	0.2207	0.5742	-0.3633	0.521	0.3095	0.0353	-0.0218	-0.0678	-0.5003	0.8347	0.7339	0.8381	0.0541
	Fructans	0.6206	0.7006	0.1476	0.5457	-0.0958	0.2894	0.0227	-0.0275	-0.1821	-0.1487	-0.2426	0.7367	0.6997	0.7168	-0.1501
	CT	-0.2436	-0.3112	-0.0563	-0.3549	-0.3067	0.0289	0.3924	0.2754	0.1843	0.2692	-0.1311	-0.2972	-0.4174	-0.2655	0.5
	Pepsin-cellulase OM digestibility	0.5559	0.8566	0.4515	0.6874	-0.3092	0.4476	0.0339	0.3053	0.0765	0.172	-0.4216	0.7818	0.7627	0.7742	-0.2283
		In vitro rumen fermentation parameters
	Pairwise two-sided p-values:	Acidification	IVDM	NH3	Total VFA	Acetate	Propionate	Butyrate	Valerate	Iso-butyrate	Iso-valerate	Acetate: propionate ratio	Total gas	CH4	CO2	CO2:CH4 ratio
Chemical composition	OM	0.0006	0.7287	0.1109	0.2975	0.843	0.9199	0.8618	0.2055	0.063	0.0078	0.9389	0.0149	0.0126	0.0193	0.8996
	C	0.1363	0.572	0.369	0.2239	0.238	0.2914	0.6589	0.2667	0.4856	0.4617	0.2688	0.2847	0.2681	0.357	0.7638
	N	0.6063	<.0001	<.0001	0.0022	0.0103	0.0012	0.5332	<.0001	0.0025	<.0001	0.002	0.0131	0.0072	0.0157	0.1039
	C:N ratio	0.7571	<.0001	<.0001	0.0041	0.0146	0.0018	0.4548	<.0001	0.0033	<.0001	0.0031	0.0182	0.0092	0.0214	0.0833
	NDF	0.2613	<.0001	0.0081	0.0092	0.229	0.0594	0.6052	0.0165	0.7395	0.1613	0.0857	0.0041	0.003	0.0047	0.324
	NDF:N ratio	0.8737	<.0001	<.0001	0.0072	0.0128	0.0024	0.4948	<.0001	0.0047	<.0001	0.0037	0.0237	0.0163	0.0271	0.1525			p-value <0.05
	WSC	<.0001	<.0001	0.4907	<.0001	0.4836	0.0776	0.4866	0.5375	0.3067	0.2264	0.1341	<.0001	<.0001	<.0001	0.5439			p-value <0.01
	Glucose	0.0002	0.0762	0.5482	0.0189	0.0234	0.05	0.0053	0.9936	0.5589	0.8492	0.024	0.0018	0.0255	0.0015	0.328			p-value <0.001
	Fructose	0.0002	0.023	0.4336	0.0103	0.0121	0.0115	0.0074	0.8706	0.4786	0.6941	0.0067	0.0006	0.0191	0.0005	0.299
	Sucrose	<.0001	<.0001	0.2026	0.0003	0.0319	0.0013	0.0704	0.8405	0.9009	0.6988	0.0022	<.0001	<.0001	<.0001	0.7577
	Fructans	<.0001	<.0001	0.3974	0.0007	0.5841	0.0918	0.8971	0.8756	0.2952	0.3938	0.1603	<.0001	<.0001	<.0001	0.3893
	CT	0.1585	0.0688	0.748	0.0364	0.0731	0.8693	0.0197	0.1094	0.2892	0.1179	0.4529	0.083	0.0126	0.1231	0.0022
	Pepsin-cellulase OM digestibility	0.0005	<.0001	0.0065	<.0001	0.0707	0.007	0.8467	0.0745	0.6624	0.3232	0.0117	<.0001	<.0001	<.0001	0.1872
	Number of observations: 36

## Sheet: Fermentation - Plants
iii) in vitro rumen fermentation parameters against above-ground biomass characteristics
		In vitro rumen fermentation parameters
	Spearman correlations :	Acidification	IVDM	NH3	Total VFA	Acetate	Propionate	Butyrate	Valerate	Iso-butyrate	Iso-valerate	Acetate: propionate ratio	Total gas	CH4	CO2	CO2:CH4 ratio
	Above ground biomass	-0.2354	-0.5645	-0.3264	-0.4211	0.1068	-0.1851	-0.0268	-0.183	-0.1931	-0.0677	0.1655	-0.3521	-0.4407	-0.3385	0.2466			p-value <0.05
Fractions	Green material	0.4153	0.668	0.3985	0.5753	-0.3205	0.4023	0.1112	0.2057	0.1086	0.1727	-0.3936	0.6311	0.5876	0.6206	-0.2162			p-value <0.01
	Flower	0.4853	-0.1954	-0.4946	0.0503	-0.0358	-0.041	0.3433	-0.3716	-0.259	-0.4247	-0.0137	0.1858	0.0972	0.2057	0.2974			p-value <0.001
	Dead material	-0.4811	0.0754	0.3822	-0.1181	0.122	-0.0891	-0.3254	0.2842	0.2088	0.2991	0.1218	-0.27	-0.1354	-0.2896	-0.2911
Relative abundance of functional groups	Grasses	-0.0674	-0.0782	0.0754	-0.0803	0.0973	-0.0031	-0.2991	-0.0471	0.1709	0.0265	0.0721	-0.0757	0.0263	-0.1084	-0.3676
	Legumes	0.2471	0.0208	-0.1586	0.0338	-0.2238	0.0907	0.4155	-0.0219	-0.1845	-0.1739	-0.1656	0.1523	-0.0196	0.1833	0.5582
	Forbs	0.1496	0.1897	-0.0891	0.1722	-0.0355	0.0505	0.2113	0.0049	-0.2595	-0.1017	-0.0677	0.1871	0.1089	0.2088	0.2324
Relative abundance of species	Agrostis spp	-0.0323	-0.2306	-0.2098	-0.1763	0.1696	-0.0569	-0.1786	-0.304	-0.0131	-0.3109	0.1331	-0.2296	-0.2028	-0.2211	-0.0018
	Arrhenaterum elatius	0.2547	0.08	-0.1504	0.0945	0.3319	-0.326	-0.1617	-0.2612	-0.2792	-0.1465	0.2992	0.201	0.2459	0.1879	-0.2303
	Alopecurus pratensis	-0.0322	0.1892	0.33	0.1053	-0.0353	0.1431	-0.2152	0.1992	0.1725	0.1864	-0.0857	0.0329	0.1233	-0.0036	-0.3349
	Dactylis glomerata	-0.1681	-0.0252	0.1185	-0.1239	-0.3668	0.2324	0.238	0.2089	0.2489	0.3421	-0.3097	-0.179	-0.2913	-0.1312	0.1969
	Holcus lanatus	0.4244	-0.0988	-0.4095	0.0432	-0.0664	-0.0008	0.3537	-0.3027	-0.1902	-0.4304	-0.0515	0.2391	0.1786	0.2417	0.2082
	Lolium perenne	0.5366	0.3529	-0.1161	0.3475	0.1256	0.0458	0.0394	-0.2698	-0.3117	-0.3586	0	0.4468	0.4896	0.4234	-0.1714
	Poa angustifolia	-0.2146	0.0063	-0.0014	0.0817	0.2249	-0.2488	-0.1447	-0.0412	-0.0485	0.0046	0.2485	-0.0526	-0.0042	-0.0766	-0.16
	Poa pratensis	-0.1076	0.2188	0.391	0.208	0.1426	-0.2039	-0.2211	0.2412	0.1264	0.2183	0.1967	0.1498	0.2535	0.1212	-0.3712
	Trisetum flavescens	0.2573	0.2077	0.1273	0.0292	-0.333	0.3272	0.2077	0.0507	0.1879	0.0185	-0.3366	0.1811	0.0786	0.2139	0.2704
	Ranunculus acris	0.038	-0.1687	-0.1659	0.0224	0.1864	-0.2485	0.1632	-0.1362	-0.1511	-0.1229	0.2283	-0.0319	-0.0124	-0.0371	-0.0497
	Other species	0.1604	0.1493	-0.0705	0.2051	-0.1596	0.053	0.2929	0.0376	-0.1526	-0.0919	-0.1156	0.2021	0.1009	0.2237	0.3328
		In vitro rumen fermentation parameters
	Pairwise two-sided p-values:	Acidification	IVDM	NH3	Total VFA	Acetate	Propionate	Butyrate	Valerate	Iso-butyrate	Iso-valerate	Acetate: propionate ratio	Total gas	CH4	CO2	CO2:CH4 ratio
	Above ground biomass	0.1669	0.0003	0.052	0.0105	0.5352	0.2799	0.8768	0.2854	0.2593	0.6948	0.3347	0.0352	0.0071	0.0435	0.1471
	Green material	0.0118	<.0001	0.0161	0.0002	0.0567	0.015	0.5185	0.2288	0.5283	0.3138	0.0176	<.0001	0.0002	<.0001	0.2053			p-value <0.05
Fractions	Flower	0.0027	0.2535	0.0022	0.771	0.8357	0.8124	0.0404	0.0256	0.1271	0.0098	0.937	0.2779	0.5729	0.2288	0.0781			p-value <0.01
	Dead material	0.003	0.662	0.0214	0.4925	0.4784	0.6055	0.0528	0.093	0.2218	0.0764	0.4793	0.1112	0.4311	0.0867	0.085			p-value <0.001
	Grasses	0.6959	0.6501	0.662	0.6415	0.5724	0.9857	0.0764	0.785	0.3189	0.878	0.6762	0.6609	0.8792	0.5293	0.0274
Relative abundance of functional groups	Legumes	0.1463	0.9041	0.3556	0.8447	0.1896	0.5989	0.0117	0.8993	0.2815	0.3103	0.3344	0.3751	0.9095	0.2846	0.0004
	Forbs	0.384	0.2678	0.6055	0.3152	0.837	0.7701	0.216	0.9774	0.1265	0.5552	0.6948	0.2745	0.5273	0.2218	0.1725
	Agrostis spp	0.8516	0.176	0.2195	0.3036	0.3226	0.7418	0.2972	0.0715	0.9394	0.0649	0.4391	0.178	0.2355	0.195	0.9917
Relative abundance of species	Arrhenaterum elatius	0.1339	0.6429	0.3812	0.5836	0.048	0.0523	0.3461	0.1239	0.0992	0.394	0.0762	0.2399	0.1482	0.2724	0.1767
	Alopecurus pratensis	0.8522	0.2691	0.0494	0.5412	0.8382	0.405	0.2075	0.2441	0.3145	0.2765	0.6192	0.8487	0.4737	0.9834	0.0459
	Dactylis glomerata	0.3271	0.8839	0.4911	0.4714	0.0278	0.1725	0.1622	0.2215	0.1432	0.0411	0.0661	0.2961	0.0848	0.4458	0.2497
	Holcus lanatus	0.0099	0.5663	0.0131	0.8023	0.7004	0.9964	0.0343	0.0727	0.2665	0.0088	0.7656	0.1601	0.2972	0.1556	0.2229
	Lolium perenne	0.0007	0.0348	0.5002	0.0378	0.4654	0.7907	0.8196	0.1116	0.0642	0.0318	1	0.0063	0.0024	0.0101	0.3175
	Poa angustifolia	0.2089	0.9709	0.9935	0.6356	0.1873	0.1434	0.3999	0.8115	0.7787	0.9786	0.1438	0.7604	0.9804	0.6571	0.3513
	Poa pratensis	0.5322	0.1998	0.0184	0.2235	0.4067	0.233	0.195	0.1565	0.4626	0.2009	0.2503	0.3832	0.1357	0.4812	0.0258
	Trisetum flavescens	0.1298	0.2241	0.4594	0.8657	0.0472	0.0514	0.2241	0.769	0.2724	0.9146	0.0447	0.2905	0.6485	0.2103	0.1107
	Ranunculus acris	0.8257	0.3252	0.3335	0.8968	0.2765	0.1438	0.3416	0.4284	0.379	0.4751	0.1804	0.8534	0.943	0.8301	0.7735
	Other species	0.3501	0.3848	0.6827	0.23	0.3525	0.7587	0.083	0.8277	0.3741	0.594	0.5021	0.2373	0.5582	0.1897	0.0473
	Number of observations: 36
